# Supplementary material for: Plasma-induced large-area N,Pt-doping and phase engineering of MoS2 nanosheets for alkaline hydrogen evolution
Source: Royal Society of Chemistry journal article supplement (doi:10.1039/d1ee03825g), 2022-01-01
Supplement: d1ee03825g2.pdf [file d1ee03825g2.pdf]

## Supporting Information

### Plasma-Induced Large-Area N,Pt-Doping and Phase Engineering of MoS<sub>2</sub> Nanosheets for Alkaline Hydrogen Evolution

Yan Sun,<sup>+a</sup> Yipeng Zang,<sup>+c</sup> Wenzhi Tian,<sup>a</sup> Xujiang Yu,<sup>a</sup> Jizhen Qi,<sup>d</sup> Liwei Chen,<sup>a,b,d</sup> Xi Liu,<sup>\*,b</sup> and Huibin Qiu<sup>\*,a</sup>

---

<sup>a</sup>Department State Key Laboratory of Metal Matrix Composites, Frontiers Science Centre for Transformative Molecules, School of Chemistry and Chemical Engineering, Shanghai Jiao Tong University, Shanghai 200240, P. R. China E-mail: hbqiu@sjtu.edu.cn.

<sup>b</sup>In-situ Centre for Physical Science, School of Chemistry and Chemical Engineering, Shanghai Jiao Tong University, Shanghai 200240, P. R. China Email: liuxi@sjtu.edu.cn.

<sup>c</sup>State Key Laboratory of Catalysis, Dalian National Laboratory for Clean Energy, Dalian Institute of Chemical Physics, Chinese Academy of Sciences, Dalian 116023, P. R. China

<sup>d</sup>CAS Centre for Excellence in Nanoscience Suzhou Institute of Nano-Tech and Nano-Bionics (SINANO), Chinese Academy of Sciences, Suzhou, 215123, P. R. China

<sup>+</sup>These authors contributed equally to this work

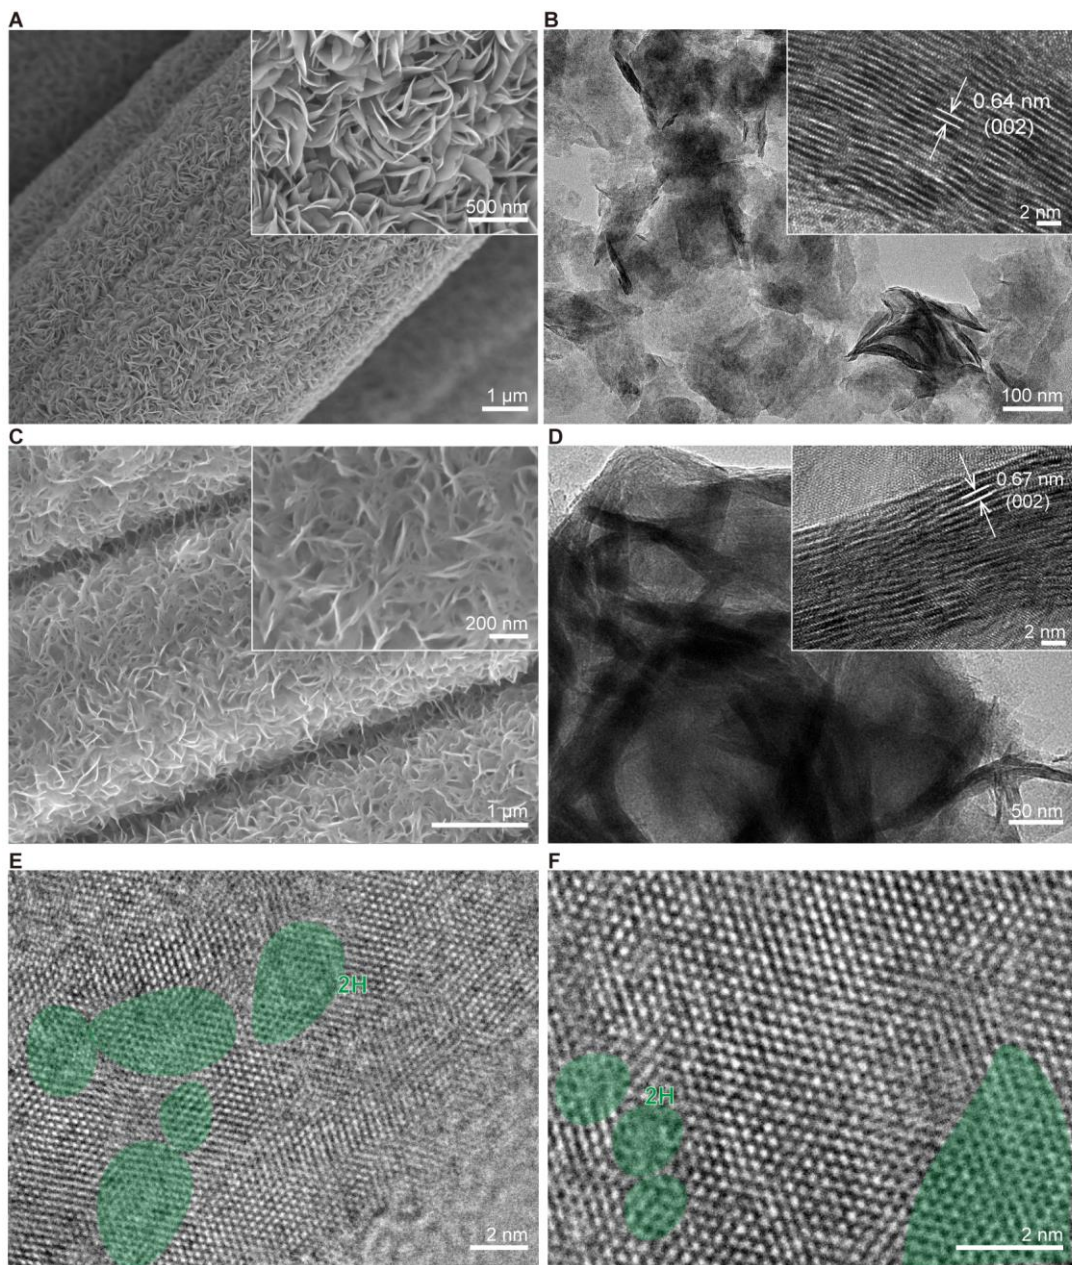

**Figure S1.** (A) SEM and (B) TEM images of MoS<sub>2</sub> nanosheets synthesized directly on CCs through a hydrothermal method. The interlayer distance (0.64 nm) corresponds to the 2H phase of MoS<sub>2</sub>. (C) SEM, (D) TEM and (E, F) HRTEM images of MoS<sub>2</sub> nanosheets treated in N<sub>2</sub> plasma for 2 h.

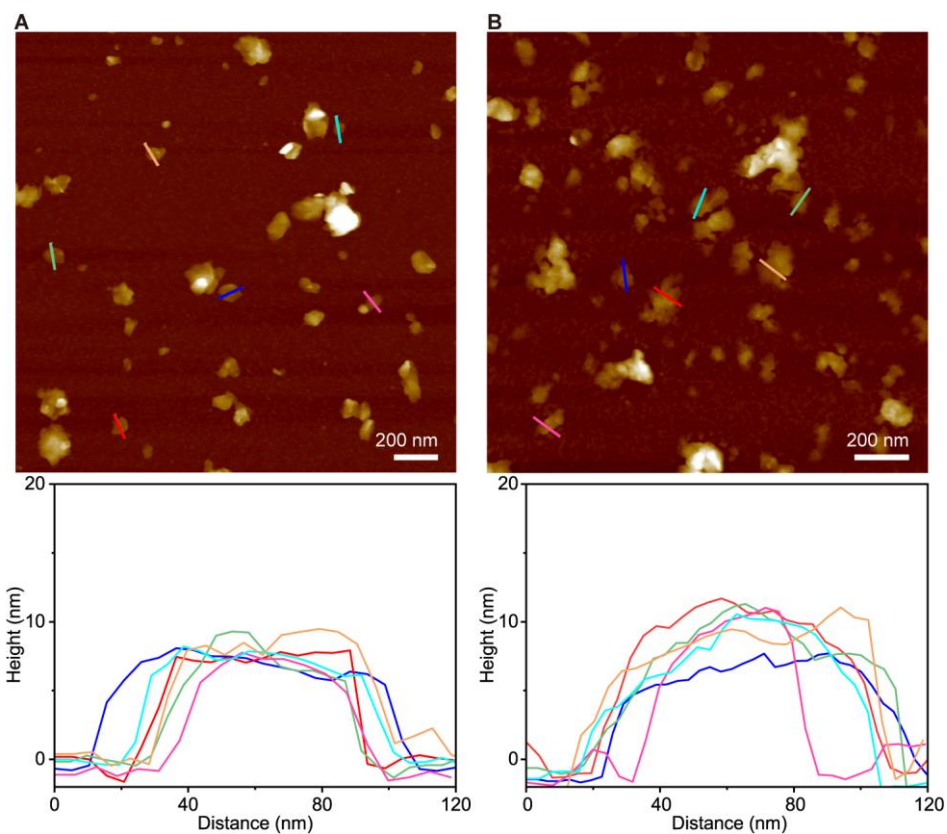

**Figure S2.** AFM height images and corresponding height profiles of (A) N-MoS<sub>2</sub> and (B) N,Pt-MoS<sub>2</sub> nanosheets. The samples were sonicated in ethanol and then the resulting dispersions were drop-casted on silicon wafers for AFM analysis.

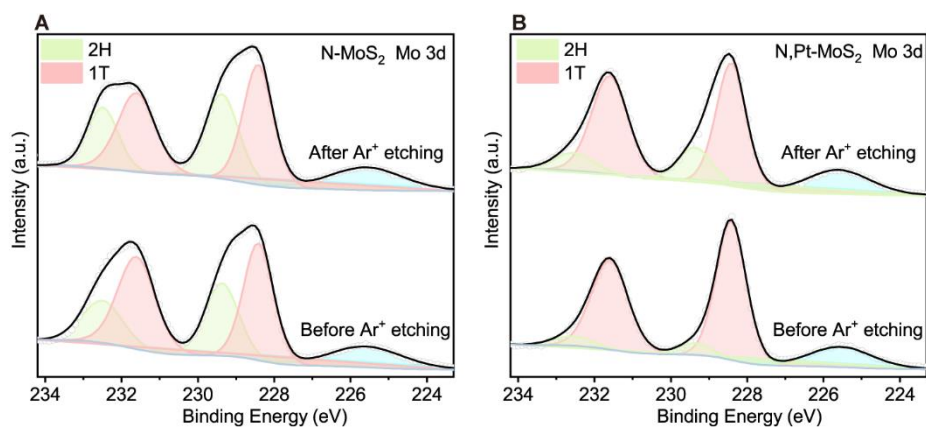

**Figure S3.** XPS spectra of Mo 3d for (A) N-MoS<sub>2</sub> and (B) N,Pt-MoS<sub>2</sub> nanosheets before and after Ar<sup>+</sup> etching for 1 h under photon energy of 1486.6 eV.

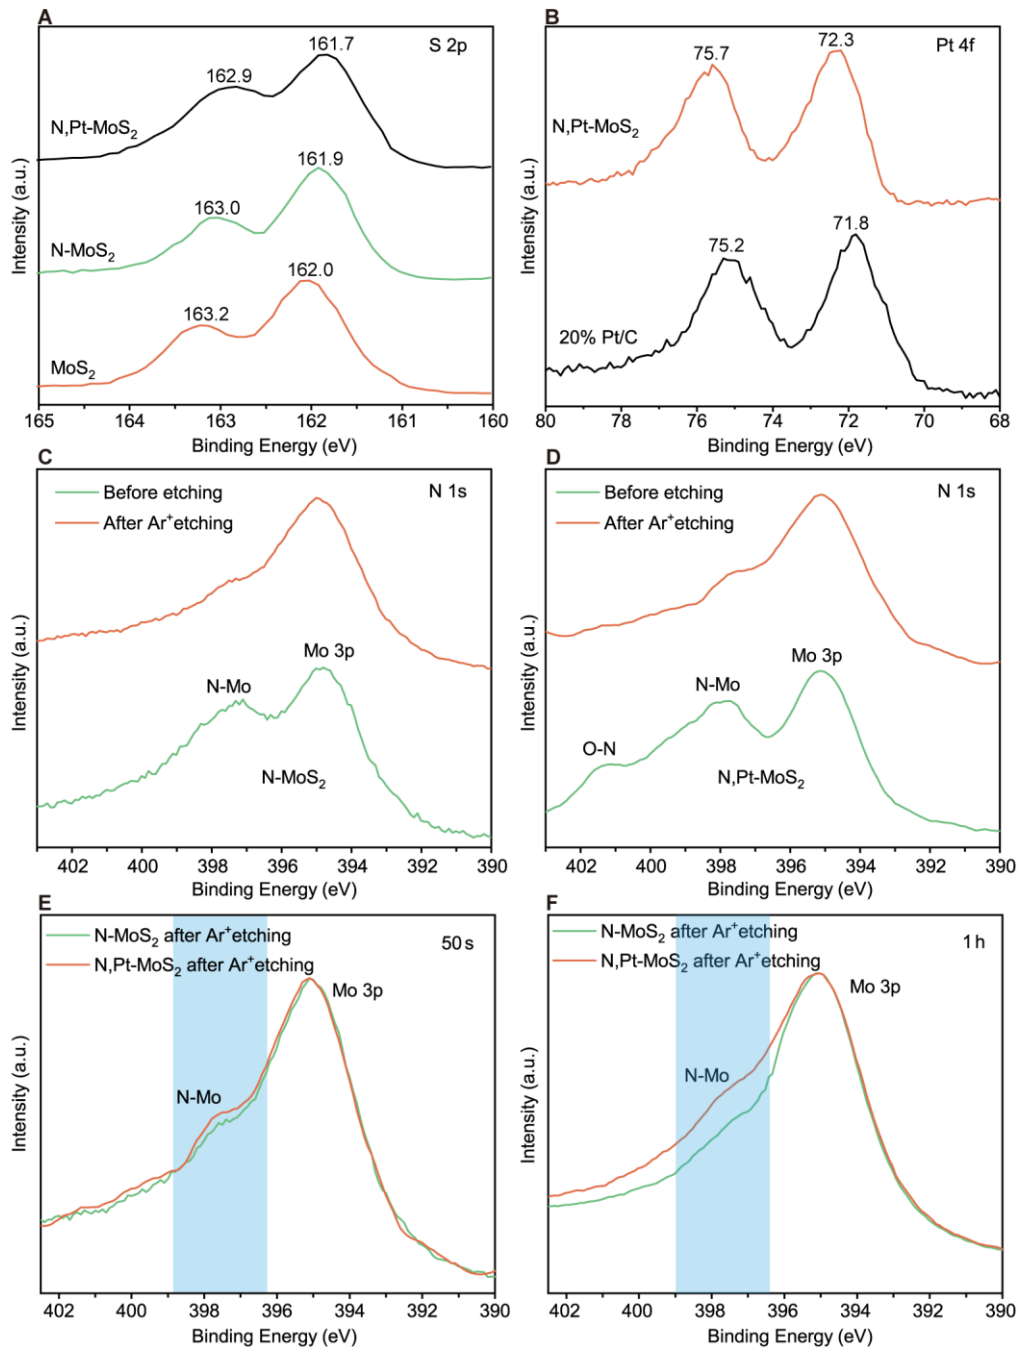

**Figure S4.** (A and B) XPS spectra of (A) S 2p and (B) Pt 4f for MoS<sub>2</sub>, N-MoS<sub>2</sub>, and N,Pt-MoS<sub>2</sub> nanosheets. (C and D) XPS spectra of N 1s for N-MoS<sub>2</sub> and N,Pt-MoS<sub>2</sub> nanosheets before and after Ar<sup>+</sup> etching for 50 s under photon energies (1486.6 eV). (E and F) XPS spectra of N 1s for N-MoS<sub>2</sub> and N,Pt-MoS<sub>2</sub> nanosheets before and after Ar<sup>+</sup> etching for 50 s and 1 h.

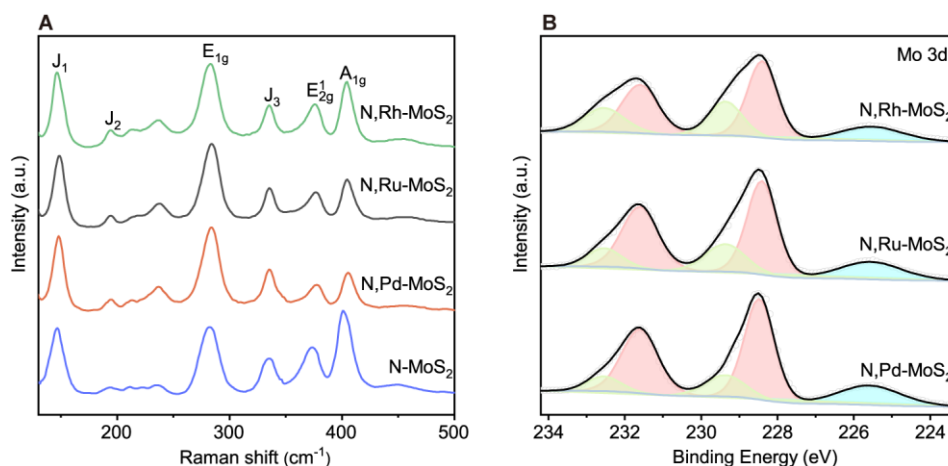

**Figure S5.** (A) Raman and (B) XPS spectra of Mo 3d for N,Rh-MoS<sub>2</sub>, N,Ru-MoS<sub>2</sub>, and N,Pd-MoS<sub>2</sub> nanosheets.

**Table S1.** Electrochemical performances comparison of N,Pt-MoS<sub>2</sub> nanosheets with the ever-reported MoS<sub>2</sub>-based catalysts in alkaline condition.

| electrocatalyst                                                                      | Electrolyte | Overpotential at 10 mA cm <sup>-2</sup> (mV) | Tafel slop (mV dec <sup>-1</sup> ) | Reference |
|--------------------------------------------------------------------------------------|-------------|----------------------------------------------|------------------------------------|-----------|
| N,Pt-MoS <sub>2</sub>                                                                | 1.0 M KOH   | 38                                           | 39                                 | This work |
| 1T-MoS <sub>2</sub> /NiS <sub>2</sub>                                                | 1.0 M KOH   | 116                                          | 72                                 | #1        |
| Co-MoS <sub>2</sub>                                                                  | 1.0 M KOH   | 48                                           | 52                                 | #2        |
| N,Mn-MoS <sub>2</sub>                                                                | 1.0 M KOH   | 66                                           | 50                                 | #3        |
| 1T-MoS <sub>2</sub> /CoS <sub>2</sub>                                                | 1.0 M KOH   | 71                                           | 60                                 | #4        |
| 1T-MoS <sub>2</sub>                                                                  | 1.0 M KOH   | 250                                          | 67                                 | #5        |
| Fe-MoS <sub>2</sub> /CoMo <sub>2</sub> S <sub>4</sub>                                | 1.0 M KOH   | 122                                          | 90                                 | #6        |
| MoS <sub>2</sub> -NiS <sub>2</sub> /N-graphen                                        | 1.0 M KOH   | 172                                          | 70                                 | #7        |
| Ru-MoS <sub>2</sub>                                                                  | 1.0 M KOH   | 41                                           | 114                                | #8        |
| MoS <sub>2</sub> /Co <sub>9</sub> S <sub>8</sub> /Ni <sub>3</sub> S <sub>2</sub> /Ni | 1.0 M KOH   | 113                                          | 85                                 | #9        |

**Table S2.** Electrochemical performances comparison of N,Pt-MoS<sub>2</sub> nanosheets and previously reported Pt-based catalysts.

| Electrocatalyst                                   | Electrolyte                          | Overpotential at 10 mA cm <sup>-2</sup> (mV) | Tafel slop (mV dec <sup>-1</sup> ) | Reference |
|---------------------------------------------------|--------------------------------------|----------------------------------------------|------------------------------------|-----------|
| N,Pt-MoS <sub>2</sub>                             | 1.0 M KOH                            | 38                                           | 39                                 | This work |
| Pt/Fe <sub>5</sub> Ni <sub>4</sub> S <sub>8</sub> | 1.0 M KOH                            | 65                                           | 44                                 | #10       |
| PtNi-O/C                                          | 0.1 M KOH                            | 40                                           | 79                                 | #11       |
| MoO <sub>x</sub> /Pt                              | 1.0 M KOH                            | -                                            | 54                                 | #12       |
| Ni-MOF@Pt                                         | 1.0 M KOH                            | 102                                          | 88                                 | #13       |
| PtNi NWs/C                                        | 1.0 M KOH                            | 40                                           | -                                  | #14       |
| Pt/Ni(HCO <sub>3</sub> ) <sub>2</sub>             | 1.0 M KOH                            | 44                                           | 45                                 | #15       |
| Pt-MoS <sub>2</sub>                               | 0.5 M H <sub>2</sub> SO <sub>4</sub> | 50                                           | 40                                 | #16       |
| Pt@PCM                                            | 0.5 M H <sub>2</sub> SO <sub>4</sub> | 105                                          | 63                                 | #17       |
| Pt SA/m-WO <sub>3-x</sub>                         | 0.5 M H <sub>2</sub> SO <sub>4</sub> | 38                                           | 45                                 | #18       |
| Pt-MoS <sub>2</sub>                               | 0.1 M H <sub>2</sub> SO <sub>4</sub> | ~150                                         | 96                                 | #19       |

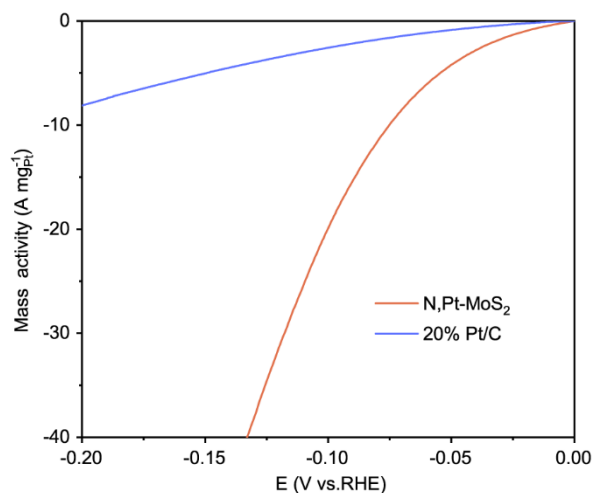

**Figure S6.** Mass activity of Pt atoms of N,Pt-MoS<sub>2</sub> nanosheets in comparison with 20% Pt/C catalyst for HER.

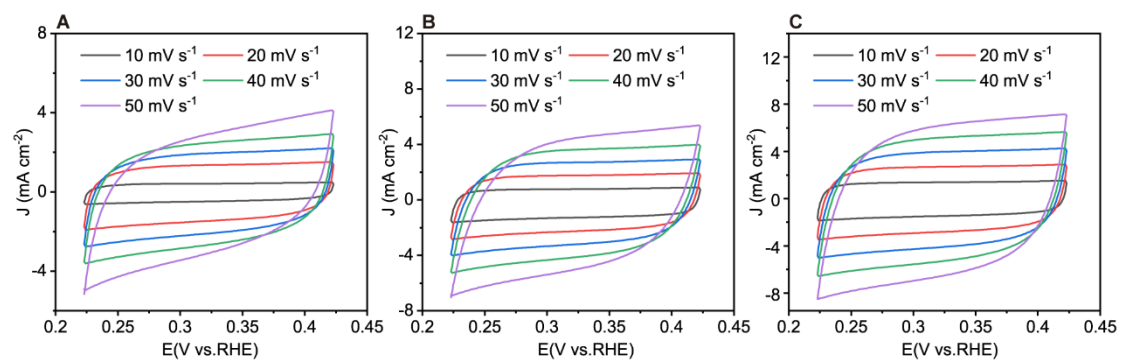

**Figure S7.** CV curves at different various scan rates of (A) MoS<sub>2</sub>, (B) N-MoS<sub>2</sub>, and (C) N,Pt-MoS<sub>2</sub> nanosheets in 1.0 M KOH solution at the potential range of 0.223 to 0.423 V (vs. RHE).

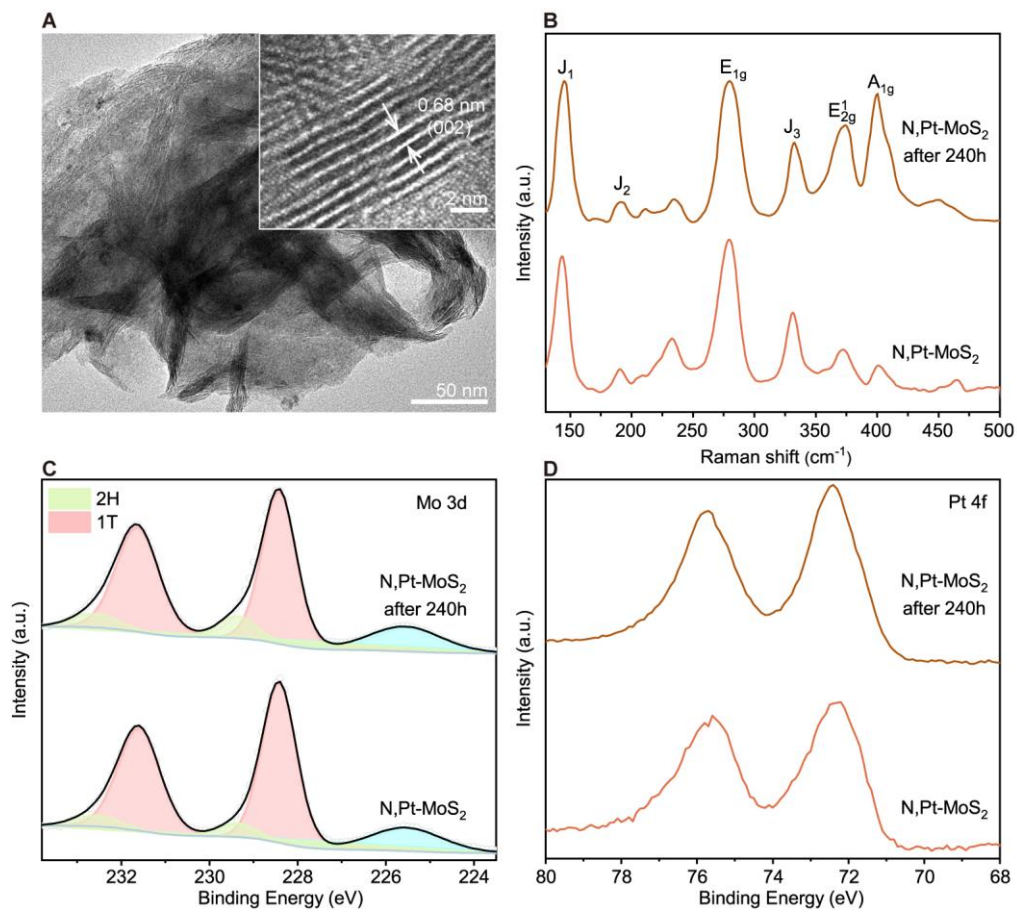

**Figure S8.** (A) TEM images, (B) Raman spectra, XPS spectra of (C) Mo 3d and (D) Pt 4f for N,Pt-MoS<sub>2</sub> nanosheets after cycling 240 h.

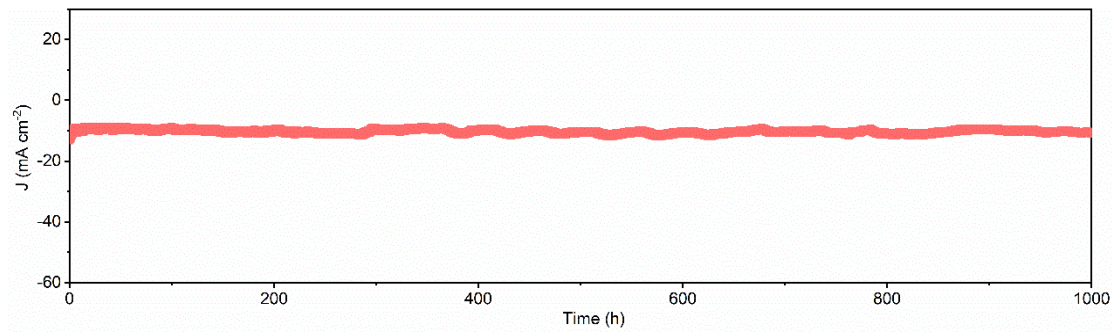

**Figure S9.** Chronopotentiometry measurement of N,Pt-MoS<sub>2</sub> nanosheets at a current density of 10 mA cm<sup>-2</sup> in 1.0 M KOH aqueous solution for a continuous period of 1000 h.

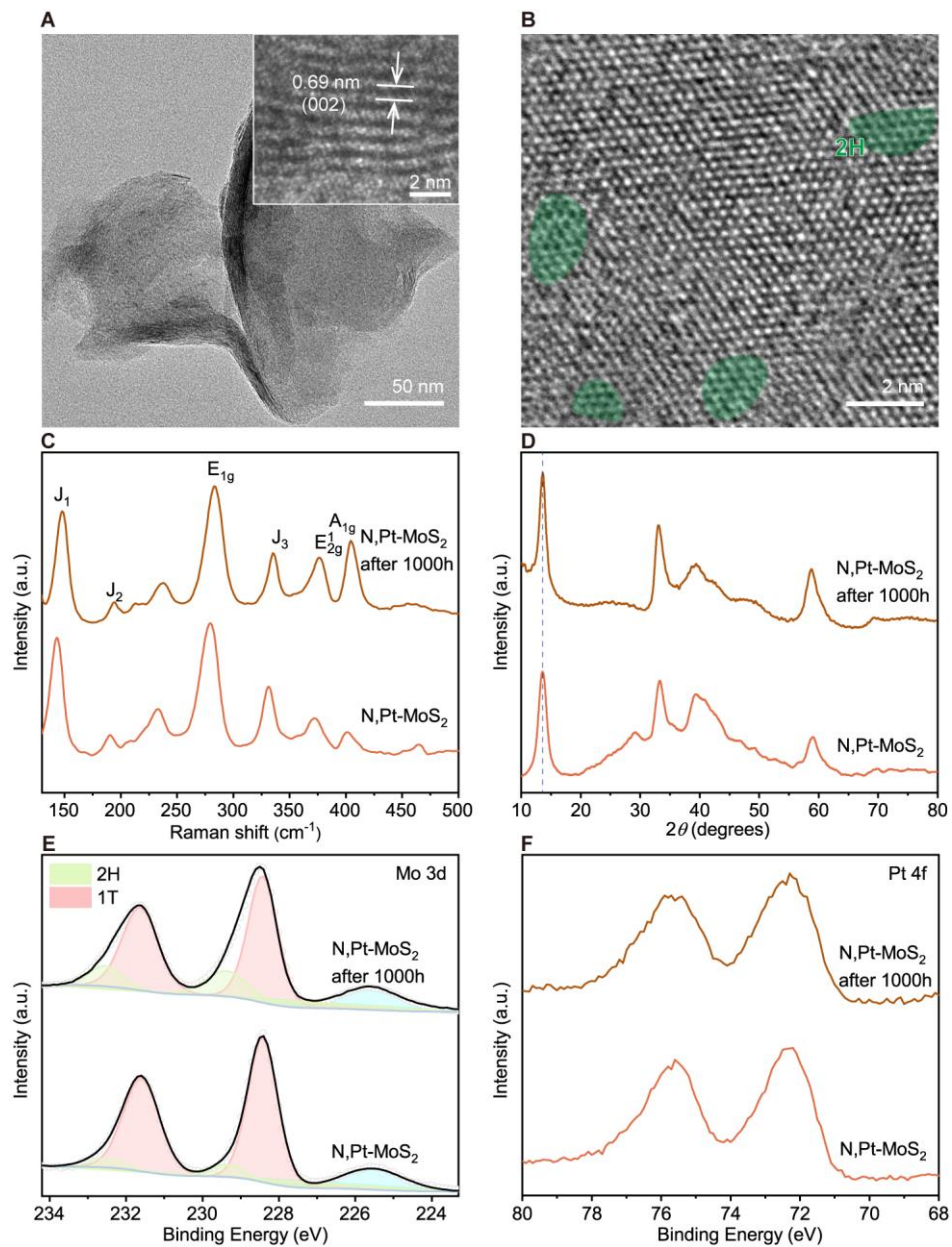

**Figure S10.** (A) TEM, (B) HRTEM images, (C) Raman spectra, (D) XRD and XPS spectra of (E) Mo 3d and (F) Pt 4f for N,Pt-MoS<sub>2</sub> nanosheets after cycling 1000 h.



The N,Pt-MoS<sub>2</sub> nanosheets may have three possible lattice structures (Figure S11). Amongst, lattice I possessed the lowest formation energy (Table S3) and was consequently adopted for further calculation.

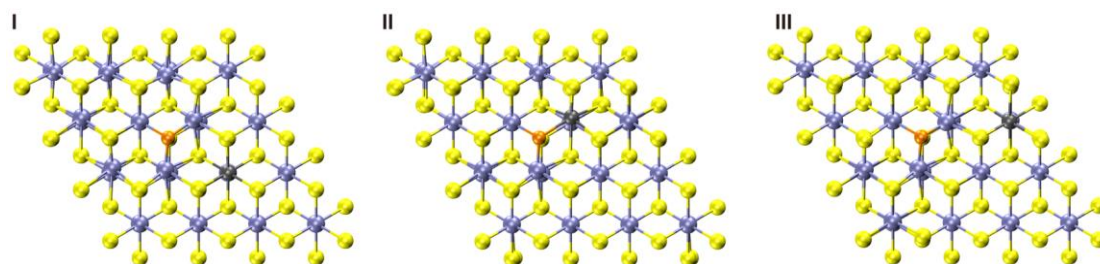

**Figure S11.** Three possible lattice structures of N,Pt-MoS<sub>2</sub> nanosheets.

**Table S3.** Formation energy of different lattice structures of N,Pt-MoS<sub>2</sub> nanosheets.

| Structures            | I       | II      | III     |
|-----------------------|---------|---------|---------|
| Formation energy (eV) | -582.01 | -581.40 | -581.67 |

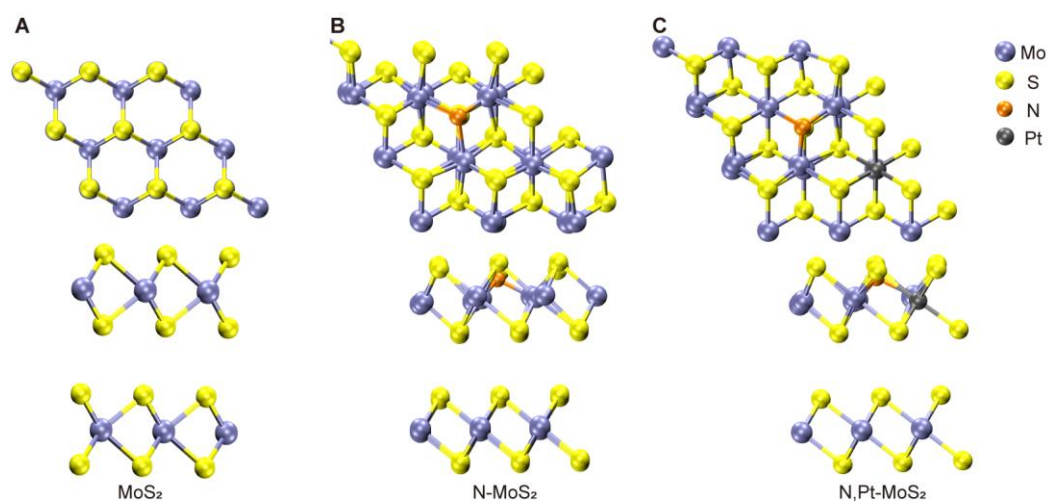

**Figure S12.** Optimized atomic configurations of top-view and side-view structures of (A) MoS<sub>2</sub>, (B) N-MoS<sub>2</sub> and (C) N,Pt-MoS<sub>2</sub> nanosheets.

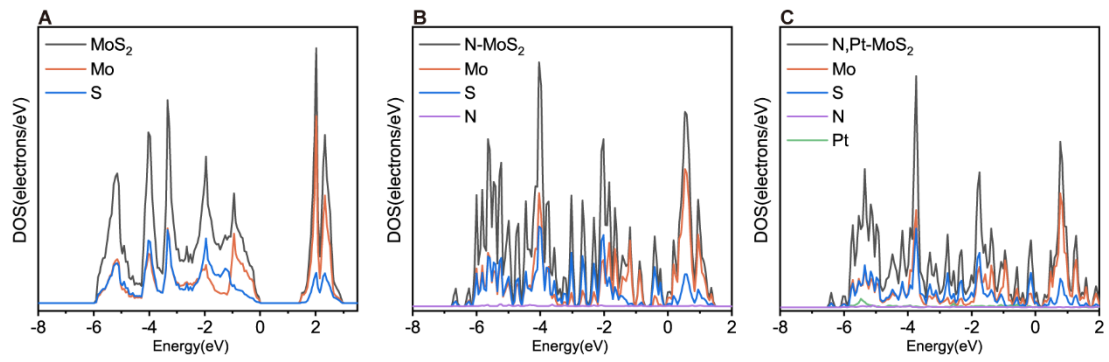

**Figure S13.** PDOS distribution of (A) MoS<sub>2</sub>, (B) N-MoS<sub>2</sub>, and (C) N,Pt-MoS<sub>2</sub> nanosheets.

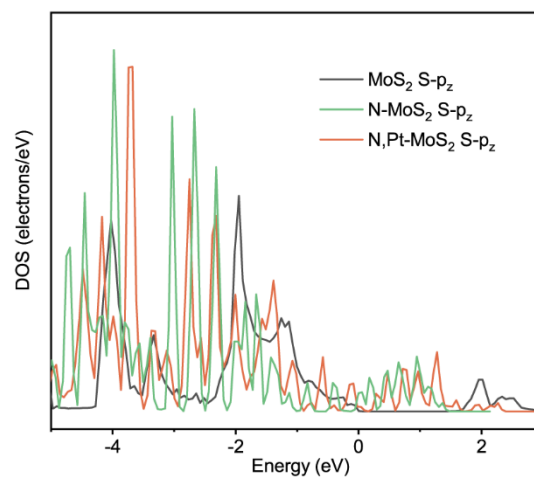

**Figure S14.** PDOS distribution of S atoms in MoS<sub>2</sub>, N-MoS<sub>2</sub>, and N,Pt-MoS<sub>2</sub> nanosheets.

We compared water absorption on different sites of the N-MoS<sub>2</sub> nanosheets (Figure S15). Water absorption on S site near the N dopant revealed the most negative energy (I, Table S4) and was consequently adopted for further calculation.

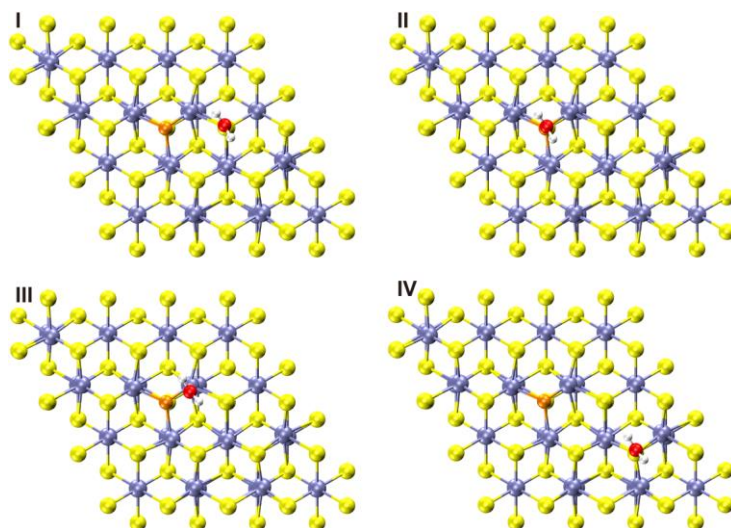

**Figure 15.** Water adsorption on different sites of N-MoS<sub>2</sub> nanosheets.

**Table S4.** Energy of water adsorption on different sites of N-MoS<sub>2</sub> nanosheets.

| Sites                        | I     | II    | III   | IV    |
|------------------------------|-------|-------|-------|-------|
| Water adsorption energy (eV) | -1.39 | -0.98 | -0.80 | -1.30 |

In order to reveal the actual active sites, we compared the energies of water absorption and dissociation on a series of possible active sites of the N,Pt-MoS<sub>2</sub> nanosheets. Based on the atomic configurations of the N,Pt-MoS<sub>2</sub> nanosheets, six different sites for water absorption were considered (Figure S16). Amongst, water absorption on S site between N and Pt atoms (Figure S16I) possessed the most negative energy (Table S5) and was consequently adopted for further water absorption calculation. Meanwhile, since water dissociation is a rate-determine step for HER, we also compared the relative energy diagram along the reaction coordinate on different active sites of the N,Pt-MoS<sub>2</sub> nanosheets (Figure S18). Amongst, S site between N and Pt atoms (Figure S17I) also possessed lowest water dissociation energy (Table S6) and was therefore chosen S as the actual active sites.

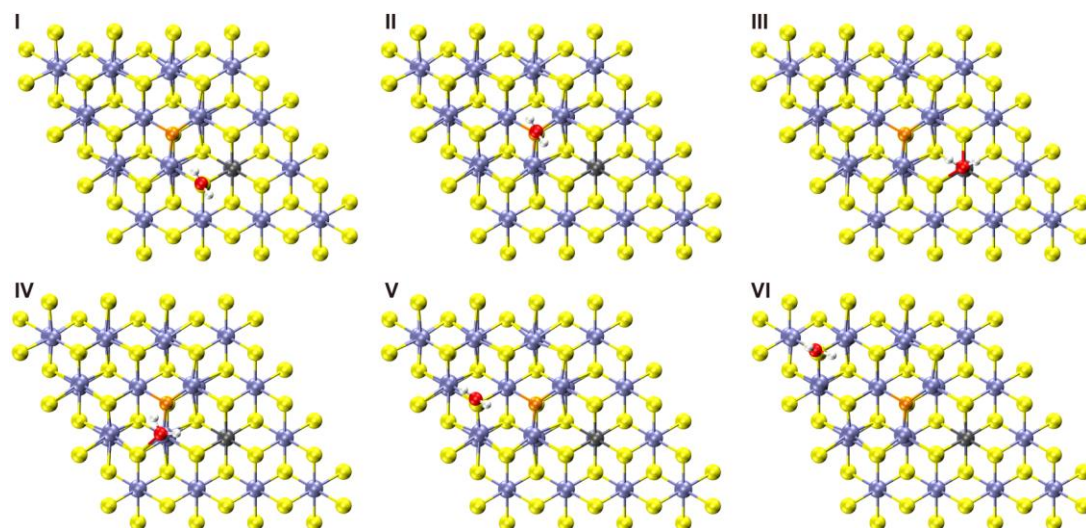

**Figure S16.** Water adsorption on different sites of N,Pt-MoS<sub>2</sub> nanosheets.

**Table S5.** Energy of water adsorption on different sites of N,Pt-MoS<sub>2</sub> nanosheets.

| Sites                        | I     | II    | III   | IV    | V     | VI    |
|------------------------------|-------|-------|-------|-------|-------|-------|
| Water adsorption energy (eV) | -1.71 | -0.89 | -1.43 | -0.59 | -1.04 | -1.30 |

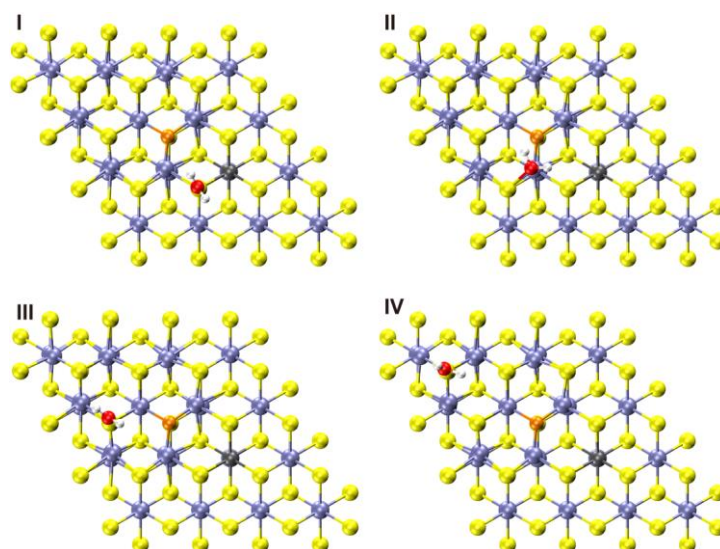

**Figure S17.** Water adsorption on different sites of N,Pt-MoS<sub>2</sub> nanosheets.

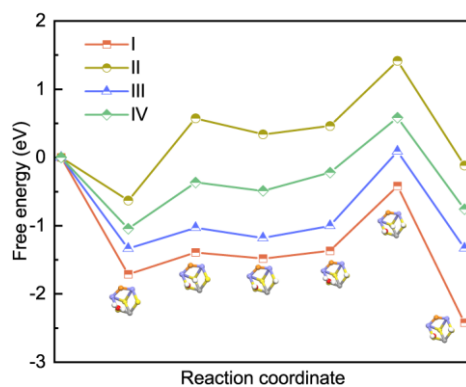

**Figure S18.** Relative energy diagram along the reaction coordinate on different sites of N,Pt-MoS<sub>2</sub> nanosheets in Figure S17.

**Table S6.** Max energy barrier for water dissociation from different sites of N,Pt-MoS<sub>2</sub> nanosheets.

| Sites                                      | I    | II   | III  | IV   |
|--------------------------------------------|------|------|------|------|
| Max water dissociation energy barrier (eV) | 0.95 | 1.20 | 1.11 | 1.06 |

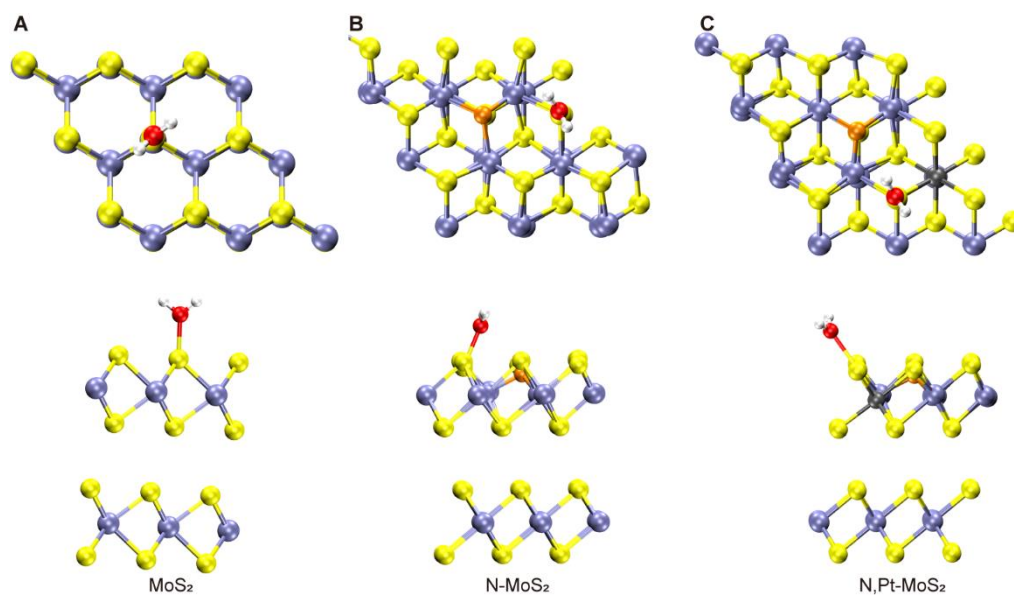

**Figure S19.** Optimized top-view and side-view structures of (A) MoS<sub>2</sub>, (B) N-MoS<sub>2</sub>, and (C) N,Pt-MoS<sub>2</sub> nanosheets with water adsorbed on the surface.

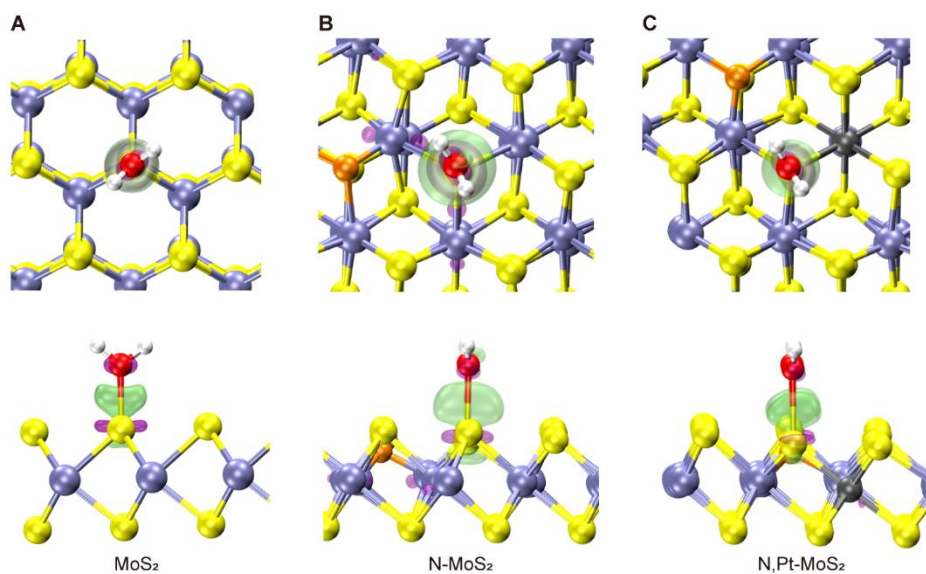

**Figure S20.** Top and side view of electron density difference with water molecules adsorbed on (A) MoS<sub>2</sub>, (B) N-MoS<sub>2</sub>, and (C) N,Pt-MoS<sub>2</sub> nanosheets.

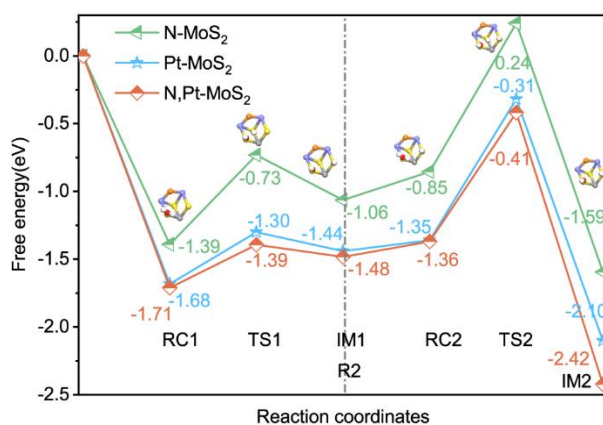

**Figure S21.** Zoom-in relative energy diagram along the reaction coordinate of N-MoS<sub>2</sub>, Pt-MoS<sub>2</sub>, and N,Pt-MoS<sub>2</sub> nanosheets.

**Table S7.** Integration areas of overlap part between S orbital and water molecule below Fermi level.

| Sample                | Area (number of states) |
|-----------------------|-------------------------|
| MoS <sub>2</sub>      | 1.13                    |
| N-MoS <sub>2</sub>    | 1.08                    |
| N,Pt-MoS <sub>2</sub> | 0.91                    |

## References

- 1 X. Chen, Z. Wang, Y. Wei, X. Zhang, Q. Zhang, L. Gu, L. Zhang, N. Yang and R. Yu, *Angew. Chem. Int. Ed.*, 2019, **58**, 17621-17624.
- 2 Q. Xiong, Y. Wang, P. F. Liu, L. R. Zheng, G. Wang, H. G. Yang, P. K. Wong, H. Zhang and H. Zhao, *Adv. Mater.*, 2018, **29**, 1801450.
- 3 T. Sun, J. Wang, X. Chi, Y. Lin, Z. Chen, X. Ling, C. Qiu, Y. Xu, L. Song, W. Chen and C. Su, *ACS Catal.*, 2018, **8**, 7585-7592.
- 4 Y. Feng, T. Zhang, J. Zhang, H. Fan, C. He and J. Song, *Small*, 2020, **16**, 2002850.
- 5 S. Park, C. Kim, S. O. Park, N. K. Oh, U. Kim, J. Lee, J. Seo, Y. Yang, H. Y. Lim, S. K. Kwak, G. Kim and H. Park, *Adv. Mater.*, 2020, **32**, 2001889.
- 6 Y. Guo, J. Tang, J. Henzie, B. Jiang, W. Xia, T. Chen, Y. Bando, Y. M. Kang, M. S. A. Hossain, Y. Sugahara and Y. Yamauchi, *ACS Nano*, 2020, **14**, 4141-4152.
- 7 P. Kuang, M. He, H. Zou, J. Yu and K. Fan, *Appl. Catal. B- Environ.*, 2019, **254**, 15-25.
- 8 D. Wang, Q. Li, C. Han, Z. Xing and X. Yang, *Appl. Catal. B- Environ.*, 2019, **249**, 91-97.
- 9 Y. Yang, H. Yao, Z. Yu, S. M. Islam, H. He, M. Yuan, Y. Yue, K. Xu, W. Hao, G. Sun, H. Li, S. Ma, P. Zapol and M. G. Kanatzidis, *J. Am. Chem. Soc.*, 2019, **141**, 10417-10430.
- 10 C. Zhang, Y. Cui, Y. Yang, L. Lu, S. Yu, Z. Meng, Y. Wu, Y. Li, Y. Wang, H. Tian and W. Zheng, *Adv. Funct. Mater.*, 2021, **31**, 2105372.
- 11 Z. Zhao, H. Liu, W. Gao, W. Xue, Z. Liu, J. Huang, X. Pan and Y. Huang, *J. Am. Chem. Soc.*, 2018, **140**, 9046-9050.
- 12 X. Yu, E. C. Dos Santos, J. White, G. Salazar-Alvarez, L. G. Pettersson, A. Cornell and M. Johnsson, *Small*, 2021, 2104288.
- 13 K. Rui, G. Zhao, M. Lao, P. Cui, X. Zheng, X. Zheng, J. Zhu, W. Huang, S. X. Dou and W. Sun, *Nano Lett.*, 2019, **19**, 8447-8453.
- 14 P. Wang, K. Jiang, G. Wang, J. Yao and X. Huang, *Angew. Chem. Int. Ed.*, 2016, **128**, 13051-13055.
- 15 M. Lao, K. Rui, G. Zhao, P. Cui, X. Zheng, S. X. Dou and W. Sun, *Angew. Chem. Int. Ed.*, 2019, **131**, 5486-5491.
- 16 X. Huang, Z. Zeng, S. Bao, M. Wang, X. Qi, Z. Fan and H. Zhang, *Nat. Commun.*, 2013, **4**, 1-8.
- 17 H. Zhang, P. An, W. Zhou, B. Y. Guan, P. Zhang, J. Dong and X. W. D. Lou, *Sci. Adv.*, 2018, **4**, 6657.
- 18 J. Park, S. Lee, H. E. Kim, A. Cho, S. Kim, Y. Ye, J. W. Han, H. Lee, J. H. Jang and J. Lee, *Angew. Chem. Int. Ed.*, 2019, **58**, 16038-16042.
- 19 J. Deng, H. Li, J. Xiao, Y. Tu, D. Deng, H. Yang, H. Tian, J. Li, P. Ren and X. Bao, *Energy Environ. Sci.*, 2015, **8**, 1594-1601.
